# Supplementary material
Source: HighWire-hosted journal article supplement (https://ajnr-sso.highwirestaging.com/highwire/filestream/77080/field_highwire_adjunct_files/0/20-00145.pdf)
Supplement: 20-00145.pdf [file 20-00145.pdf]

## ON-LINE APPENDIX

### Vascular Risk Factors

Cardiovascular risk factors were collected using structured questionnaires, physical examinations, and blood tests. Blood pressure was measured 3 times, and the mean value of the 3 readings was used. Hypertension was defined as self-reported hypertension, treatment with antihypertensive medication, systolic blood pressure of  $\geq 140$  mm Hg, or diastolic blood pressure of  $\geq 90$  mm Hg. Diabetes mellitus was defined as self-reported diabetes, use of oral antidiabetic drugs or insulin, or fasting serum glucose  $\geq 126$  mg/dL. Hyperlipidemia was defined as self-reported hyperlipidemia, treatment with antihyperlipidemic medication, total cholesterol of  $>200$  mg/dL, or low-density lipoprotein of  $>130$  mg/dL. Smoking status was defined as a current smoker or a former smoker.

### Diffusion Imaging Processing

Diffusion-weighted images were acquired using a single-shot spin-echo, echo-planar imaging sequence covering the whole brain with the following parameters: 62 axial slices, slice thickness = 2.2 mm without gap, TR = 8000 ms, TE = 89 ms, flip angle =  $90^\circ$ , 30 diffusion directions with  $b=1000$  s/mm<sup>2</sup> and an additional image without diffusion weighting (ie,  $b=0$  s/mm<sup>2</sup>), acquisition matrix =  $128 \times 128$ , FOV =  $280 \times 280$  mm<sup>2</sup>, average = 2. Diffusion tensor images were processed using PANDA, a pipeline toolbox for diffusion MRI analysis.<sup>1</sup> Briefly, the procedure included skull-stripping, eddy current and head motion correction, diffusion parameter calculation, and spatial normalization. FA, MD, axial diffusivity, and radial diffusivity maps in native space and standard Montreal Neurological Institute space were generated for each individual.

### REFERENCE

1. Cui Z, Zhong S, Xu P, et al. PANDA: a pipeline toolbox for analyzing brain diffusion images. *Front Hum Neurosci* 2013;7:42 CrossRef Medline

**On-line Table: Characteristics of the study population**

| ID | Age (yr) | Sex | CMB Location   | Tract Volume with CMB (mm <sup>3</sup> ) | Tract Volume Contralateral Hemisphere (mm <sup>3</sup> ) <sup>a</sup> |
|----|----------|-----|----------------|------------------------------------------|-----------------------------------------------------------------------|
| 1  | 56       | F   | External, R    | 1284                                     | 1558                                                                  |
| 2  | 61       | F   | Internal, R    | 2284                                     | 3147                                                                  |
| 3  | 62       | M   | External, R    | 1137                                     | 1147                                                                  |
| 4  | 60       | F   | Occipital, R   | 1600                                     | 1337                                                                  |
| 5  | 54       | M   | Frontal, L     | 832                                      | 821                                                                   |
| 6  | 35       | F   | Subcortical, R | 1484                                     | 1937                                                                  |
| 7  | 45       | F   | Temporal, L    | 811                                      | 737                                                                   |
| 8  | 70       | F   | Subcortical, L | 2074                                     | 2053                                                                  |
| 9  | 72       | F   | Temporal, L    | 1137                                     | 1771                                                                  |
| 10 | 47       | M   | Temporal, R    | 1348                                     | 1316                                                                  |
| 11 | 59       | M   | Temporal, R    | 2011                                     | 1821                                                                  |
| 12 | 59       | M   | Temporal, R    | 2000                                     | 1505                                                                  |
| 13 | 63       | F   | Occipital, R   | 2737                                     | 1873                                                                  |
| 14 | 70       | F   | Frontal, R     | 1084                                     | 1328                                                                  |
| 15 | 56       | M   | Frontal, R     | 1063                                     | 1358                                                                  |
| 16 | 48       | F   | Occipital, L   | 1305                                     | 2063                                                                  |
| 17 | 64       | F   | Parietal, R    | 4895                                     | 4747                                                                  |
| 18 | 64       | M   | Parietal, R    | 1421                                     | 1368                                                                  |
| 19 | 65       | M   | Frontal, R     | 737                                      | 937                                                                   |
| 20 | 51       | F   | Temporal, L    | 4589                                     | 3126                                                                  |

**Note:**—R indicates right; L, left; External, external capsule; Internal, internal capsule; Occipital, occipital lobe; Frontal, frontal lobe; Subcortical, subcortical white matter; Temporal, temporal lobe; Parietal, parietal lobe; ID, identification.

<sup>a</sup> The estimated tract volume did not differ between the affected and control tracts ( $P > .05$ ).

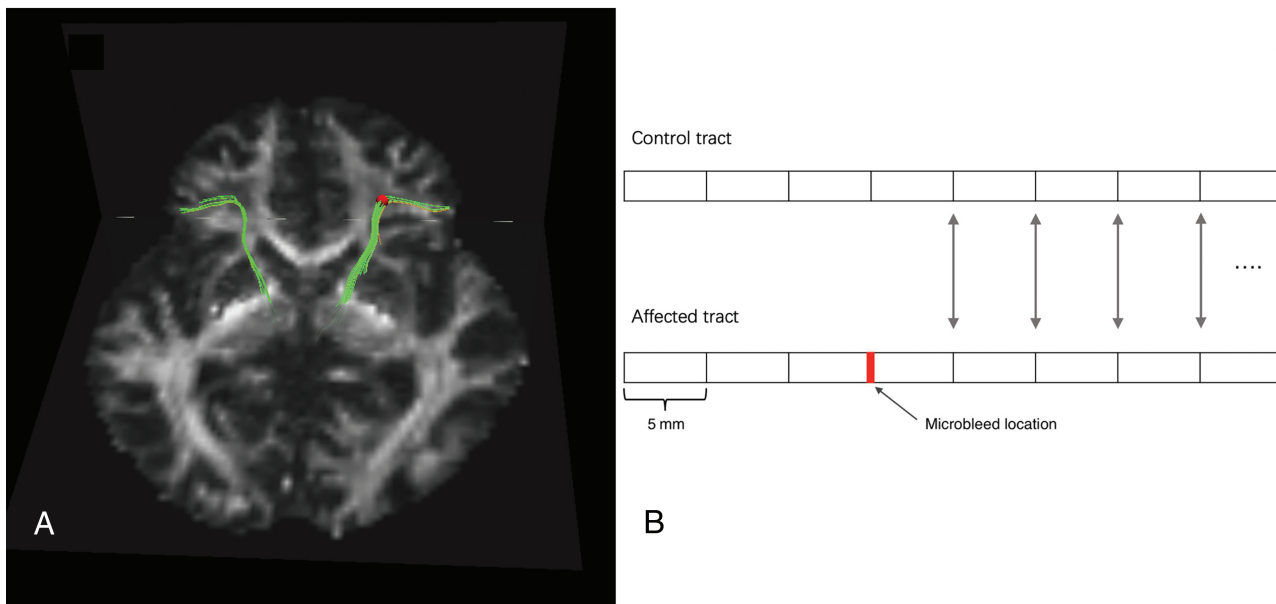

**ON-LINE FIGURE.** *A*, Example of a white matter tract containing a microbleed and the corresponding nonaffected tract in the contralateral hemisphere. Red indicates the location of the microbleed. *B*, Comparisons were made between the affected and control tracts for each point at 5-mm intervals. For microbleeds located at the end of the tract, diffusion properties were investigated along the tract pathways. For microbleeds located in the middle of the tract, diffusion properties were investigated at both sides; those segments with the same distance from the microbleeds were averaged for data analysis.
